# Supplementary material
Source: PubMed Central journal article supplement (PMC3197990)
Supplement: supp_amiajnl-2011-000117_JAMIA-2011-000117-R2-Dennehy-Appendix-2.pdf [file supp_amiajnl-2011-000117_JAMIA-2011-000117-R2-Dennehy-Appendix-2.pdf]

## Appendix 2. Electronic Health Record (EHR) End User Evaluation Questionnaire

| SECTION 1. Demographics                                                                                                                                                                                                                                                                                                                                                                                                                                                                     |                                                                                                                                                                                                                                                                                                                                                                          |
|---------------------------------------------------------------------------------------------------------------------------------------------------------------------------------------------------------------------------------------------------------------------------------------------------------------------------------------------------------------------------------------------------------------------------------------------------------------------------------------------|--------------------------------------------------------------------------------------------------------------------------------------------------------------------------------------------------------------------------------------------------------------------------------------------------------------------------------------------------------------------------|
| <i>Instruction:</i> If you have already provided this information in the Computer Literacy Survey previously conducted, please skip to SECTION 2.                                                                                                                                                                                                                                                                                                                                           |                                                                                                                                                                                                                                                                                                                                                                          |
| Your 5 Digit ID #: _____                                                                                                                                                                                                                                                                                                                                                                                                                                                                    |                                                                                                                                                                                                                                                                                                                                                                          |
| Your age: _____                                                                                                                                                                                                                                                                                                                                                                                                                                                                             |                                                                                                                                                                                                                                                                                                                                                                          |
| Your gender                                                                                                                                                                                                                                                                                                                                                                                                                                                                                 | <input type="radio"/> Male<br><input type="radio"/> Female                                                                                                                                                                                                                                                                                                               |
| Please indicate your provider or staff type:                                                                                                                                                                                                                                                                                                                                                                                                                                                |                                                                                                                                                                                                                                                                                                                                                                          |
| Provider type:                                                                                                                                                                                                                                                                                                                                                                                                                                                                              | Staff type:                                                                                                                                                                                                                                                                                                                                                              |
| <input type="radio"/> Advanced practice nurse<br><input type="radio"/> Behavioral Health Therapist<br><input type="radio"/> Complementary Therapist<br><input type="radio"/> Dentist<br><input type="radio"/> Optometrist<br><input type="radio"/> Physical therapist<br><input type="radio"/> Physician<br><input type="radio"/> Physician Assistant<br><input type="radio"/> Podiatrist<br><input type="radio"/> Social worker<br><br><input type="radio"/> Other (please specify): _____ | <input type="radio"/> Case Manager<br><input type="radio"/> Lab Staff<br><input type="radio"/> Management<br><input type="radio"/> Medical Assistant<br><input type="radio"/> Medical Records<br><input type="radio"/> Nursing<br><input type="radio"/> Patient Services<br><input type="radio"/> Quality Improvement                                                    |
| If you are a provider, what is your specialty?                                                                                                                                                                                                                                                                                                                                                                                                                                              | <input type="radio"/> Family Practice<br><input type="radio"/> Mental/Behavioral Health<br><input type="radio"/> OB/GYN/Women's Health<br><input type="radio"/> Other (please specify): _____ <span style="margin-left: 20px;"> <input type="radio"/> Adult/Internal medicine<br/> <input type="radio"/> Midwife<br/> <input type="radio"/> Pediatrics           </span> |
| Years in practice: _____                                                                                                                                                                                                                                                                                                                                                                                                                                                                    |                                                                                                                                                                                                                                                                                                                                                                          |
| Years working in clinic: _____                                                                                                                                                                                                                                                                                                                                                                                                                                                              |                                                                                                                                                                                                                                                                                                                                                                          |
| Country of Origin                                                                                                                                                                                                                                                                                                                                                                                                                                                                           | <input type="radio"/> United States<br><input type="radio"/> Other (please specify): _____<br><br><input type="radio"/> If other, how many years have you been in the United States: _____                                                                                                                                                                               |
| SECTION 2. Prior Experience of EHRs                                                                                                                                                                                                                                                                                                                                                                                                                                                         |                                                                                                                                                                                                                                                                                                                                                                          |
| What EHR system are you currently using? _____                                                                                                                                                                                                                                                                                                                                                                                                                                              |                                                                                                                                                                                                                                                                                                                                                                          |
| How long have you been using this EHR? _____                                                                                                                                                                                                                                                                                                                                                                                                                                                |                                                                                                                                                                                                                                                                                                                                                                          |
| <b>Prior to using this system, do you have any experience with EHRs before?</b> Note an EHR must provide at least the following 2 basic functions: (1) capture and display of critical patient data; and (2) providing some level of decision-support (e.g. disease management template, drug interaction alerts). <input type="radio"/> No <input type="radio"/> Yes                                                                                                                       |                                                                                                                                                                                                                                                                                                                                                                          |
|                                                                                                                                                                                                                                                                                                                                                                                                                                                                                             | <b>Much worse    Worse    No difference    Better    Much better</b>                                                                                                                                                                                                                                                                                                     |
| <b>If NO:</b> Compared to your experience before this EHR was installed, how has use of this EHR changed your work?                                                                                                                                                                                                                                                                                                                                                                         | <input type="radio"/> <input type="radio"/> <input type="radio"/> <input type="radio"/> <input type="radio"/>                                                                                                                                                                                                                                                            |
|                                                                                                                                                                                                                                                                                                                                                                                                                                                                                             | <b>Much worse    Worse    Similar    Better    Much better</b>                                                                                                                                                                                                                                                                                                           |
| <b>If YES:</b> In general, how would you rate this EHR compared to the EHR system(s) you used before?                                                                                                                                                                                                                                                                                                                                                                                       | <input type="radio"/> <input type="radio"/> <input type="radio"/> <input type="radio"/> <input type="radio"/>                                                                                                                                                                                                                                                            |
| <b>If YES:</b> Please provide the vendor or product name of the EHR system(s) you used most recently:                                                                                                                                                                                                                                                                                                                                                                                       |                                                                                                                                                                                                                                                                                                                                                                          |

|                                                                                                             |
|-------------------------------------------------------------------------------------------------------------|
|                                                                                                             |
|                                                                                                             |
| <b>If YES:</b> In what particular way does your experience with this EHR differ from your prior experience? |
|                                                                                                             |
|                                                                                                             |

| <b>SECTION 3. Your EHR Use Environment</b>                                                                                                             |                                                                                                                                  |                         |                                                             |                       |                       |
|--------------------------------------------------------------------------------------------------------------------------------------------------------|----------------------------------------------------------------------------------------------------------------------------------|-------------------------|-------------------------------------------------------------|-----------------------|-----------------------|
| <i>Instruction:</i> Based on your experience with this EHR, please indicate the extent to which you agree (or disagree) with the following statements: |                                                                                                                                  |                         |                                                             |                       |                       |
|                                                                                                                                                        | <b>Strongly disagree</b>                                                                                                         | <b>Disagree</b>         | <b>Agree</b>                                                | <b>Strongly agree</b> |                       |
| Our facility has adequate dedicated IT staff.                                                                                                          | <input type="radio"/>                                                                                                            | <input type="radio"/>   | <input type="radio"/>                                       | <input type="radio"/> |                       |
| The system crashes often in the middle of a visit.                                                                                                     | <input type="radio"/>                                                                                                            | <input type="radio"/>   | <input type="radio"/>                                       | <input type="radio"/> |                       |
| When this EHR system is down, we have policies and procedures to allow the clinic to continue to see patients.                                         | <input type="radio"/>                                                                                                            | <input type="radio"/>   | <input type="radio"/>                                       | <input type="radio"/> |                       |
| Our facility has adequate computer terminals to access this EHR.                                                                                       | <input type="radio"/>                                                                                                            | <input type="radio"/>   | <input type="radio"/>                                       | <input type="radio"/> |                       |
| Lab results appear in this EHR in a timely fashion.                                                                                                    | <input type="radio"/>                                                                                                            | <input type="radio"/>   | <input type="radio"/>                                       | <input type="radio"/> |                       |
| This EHR allows me to review trends in lab values.                                                                                                     | <input type="radio"/>                                                                                                            | <input type="radio"/>   | <input type="radio"/>                                       | <input type="radio"/> |                       |
| The project plan was adequately communicated to us during implementation.                                                                              | <input type="radio"/>                                                                                                            | <input type="radio"/>   | <input type="radio"/>                                       | <input type="radio"/> |                       |
| The administration of our facility was supportive during implementation.                                                                               | <input type="radio"/>                                                                                                            | <input type="radio"/>   | <input type="radio"/>                                       | <input type="radio"/> |                       |
| Adequate resources were committed to the implementation.                                                                                               | <input type="radio"/>                                                                                                            | <input type="radio"/>   | <input type="radio"/>                                       | <input type="radio"/> |                       |
| What is the main device you use to access this EHR?                                                                                                    | <input type="radio"/> Desktop Computer<br><input type="radio"/> Tablet PC<br><input type="radio"/> Other (please specify): _____ |                         | <input type="radio"/> Laptop<br><input type="radio"/> Slate |                       |                       |
| Does your main device access this EHR wirelessly?                                                                                                      | <input type="radio"/> Yes<br><input type="radio"/> No                                                                            |                         | <input type="radio"/> Do not know                           |                       |                       |
|                                                                                                                                                        | <b>Always</b>                                                                                                                    | <b>Most of the time</b> | <b>Half of the time</b>                                     | <b>Infrequently</b>   | <b>Never</b>          |
| Does your facility still operate on paper to support some processes?                                                                                   | <input type="radio"/>                                                                                                            | <input type="radio"/>   | <input type="radio"/>                                       | <input type="radio"/> | <input type="radio"/> |
| If so, please specify what these paper-based processes are:                                                                                            |                                                                                                                                  |                         |                                                             |                       |                       |
|                                                                                                                                                        |                                                                                                                                  |                         |                                                             |                       |                       |
|                                                                                                                                                        |                                                                                                                                  |                         |                                                             |                       |                       |

| <b>SECTION 4. Evaluation of the EHR</b>                                                                                                    |
|--------------------------------------------------------------------------------------------------------------------------------------------|
| <i>Instruction:</i> Based on your experience with this EHR, please indicate the extent to which you agree (or disagree) with the following |

| statements:                                                                             |                       |                       |                       |                       |
|-----------------------------------------------------------------------------------------|-----------------------|-----------------------|-----------------------|-----------------------|
|                                                                                         | Strongly disagree     | Disagree              | Agree                 | Strongly agree        |
| Use of this EHR has helped me:                                                          |                       |                       |                       |                       |
| Get my work done more efficiently.                                                      | <input type="radio"/> | <input type="radio"/> | <input type="radio"/> | <input type="radio"/> |
| Avoid making mistakes (e.g. overlook of a drug interaction).                            | <input type="radio"/> | <input type="radio"/> | <input type="radio"/> | <input type="radio"/> |
| Provide more comprehensive care to my patients.                                         | <input type="radio"/> | <input type="radio"/> | <input type="radio"/> | <input type="radio"/> |
| Provide better quality of care to my patients.                                          | <input type="radio"/> | <input type="radio"/> | <input type="radio"/> | <input type="radio"/> |
| Improve the satisfaction of my patients.                                                | <input type="radio"/> | <input type="radio"/> | <input type="radio"/> | <input type="radio"/> |
| Learning how to use this EHR is easy to me.                                             | <input type="radio"/> | <input type="radio"/> | <input type="radio"/> | <input type="radio"/> |
| This EHR is easy to use.                                                                | <input type="radio"/> | <input type="radio"/> | <input type="radio"/> | <input type="radio"/> |
| This EHR screens are intuitive.                                                         | <input type="radio"/> | <input type="radio"/> | <input type="radio"/> | <input type="radio"/> |
| I received adequate training on how to use this EHR.                                    | <input type="radio"/> | <input type="radio"/> | <input type="radio"/> | <input type="radio"/> |
| My questions about use of this EHR were sufficiently answered.                          | <input type="radio"/> | <input type="radio"/> | <input type="radio"/> | <input type="radio"/> |
| I received technical support whenever I need it.                                        | <input type="radio"/> | <input type="radio"/> | <input type="radio"/> | <input type="radio"/> |
| I am satisfied with the support I have received in use of this EHR.                     | <input type="radio"/> | <input type="radio"/> | <input type="radio"/> | <input type="radio"/> |
| Overall, I am satisfied with my experience with this EHR.                               | <input type="radio"/> | <input type="radio"/> | <input type="radio"/> | <input type="radio"/> |
| My experience with this EHR is better than I expected.                                  | <input type="radio"/> | <input type="radio"/> | <input type="radio"/> | <input type="radio"/> |
| I would recommend this EHR to other similar practices.                                  | <input type="radio"/> | <input type="radio"/> | <input type="radio"/> | <input type="radio"/> |
| I believe I can do my job better <b>without</b> this EHR.                               | <input type="radio"/> | <input type="radio"/> | <input type="radio"/> | <input type="radio"/> |
| My colleagues have negative opinion about this EHR.                                     | <input type="radio"/> | <input type="radio"/> | <input type="radio"/> | <input type="radio"/> |
| Overall, I think our practice's transition to this EHR was a bad idea.                  | <input type="radio"/> | <input type="radio"/> | <input type="radio"/> | <input type="radio"/> |
| Use of this EHR interferes with my work.                                                | <input type="radio"/> | <input type="radio"/> | <input type="radio"/> | <input type="radio"/> |
| Use of this EHR is easier than I expected.                                              | <input type="radio"/> | <input type="radio"/> | <input type="radio"/> | <input type="radio"/> |
| The EHR screens respond to my actions instantly.                                        | <input type="radio"/> | <input type="radio"/> | <input type="radio"/> | <input type="radio"/> |
| I would be in favor of ceasing use of this EHR in our practice.                         | <input type="radio"/> | <input type="radio"/> | <input type="radio"/> | <input type="radio"/> |
| Use of this EHR requires me to do more work compared to what I used to do.              | <input type="radio"/> | <input type="radio"/> | <input type="radio"/> | <input type="radio"/> |
| We should go back to paper forms.                                                       | <input type="radio"/> | <input type="radio"/> | <input type="radio"/> | <input type="radio"/> |
| The system downtime is acceptable.                                                      | <input type="radio"/> | <input type="radio"/> | <input type="radio"/> | <input type="radio"/> |
| This EHR provides all functionalities that I expected.                                  | <input type="radio"/> | <input type="radio"/> | <input type="radio"/> | <input type="radio"/> |
| If there are some functionalities missing in this EHR, please specify:<br>_____         |                       |                       |                       |                       |
| What additional help you would need to use this EHR more effectively?<br>_____          |                       |                       |                       |                       |
| Is there a particular way the support of your use of this EHR can be improved?<br>_____ |                       |                       |                       |                       |

**SECTION 5. EHR Impact**

*Instruction:* Based on your experience, please indicate whether you believe the effect of this EHR on your clinical practice has been beneficial, detrimental, or neither, using the scale below:

|                                                              | Highly detrimental    | Detrimental on the whole | Neither detrimental nor beneficial | Beneficial on the whole | Highly beneficial     |
|--------------------------------------------------------------|-----------------------|--------------------------|------------------------------------|-------------------------|-----------------------|
| Costs of providing care                                      | <input type="radio"/> | <input type="radio"/>    | <input type="radio"/>              | <input type="radio"/>   | <input type="radio"/> |
| Clinician autonomy                                           | <input type="radio"/> | <input type="radio"/>    | <input type="radio"/>              | <input type="radio"/>   | <input type="radio"/> |
| Quality of health care                                       | <input type="radio"/> | <input type="radio"/>    | <input type="radio"/>              | <input type="radio"/>   | <input type="radio"/> |
| Interactions within the health care team                     | <input type="radio"/> | <input type="radio"/>    | <input type="radio"/>              | <input type="radio"/>   | <input type="radio"/> |
| Enjoyment of clinical practice                               | <input type="radio"/> | <input type="radio"/>    | <input type="radio"/>              | <input type="radio"/>   | <input type="radio"/> |
| Clinicians' stress level                                     | <input type="radio"/> | <input type="radio"/>    | <input type="radio"/>              | <input type="radio"/>   | <input type="radio"/> |
| Clinicians' self-image                                       | <input type="radio"/> | <input type="radio"/>    | <input type="radio"/>              | <input type="radio"/>   | <input type="radio"/> |
| Humaneness of clinical practice                              | <input type="radio"/> | <input type="radio"/>    | <input type="radio"/>              | <input type="radio"/>   | <input type="radio"/> |
| The rapport between clinicians and patients                  | <input type="radio"/> | <input type="radio"/>    | <input type="radio"/>              | <input type="radio"/>   | <input type="radio"/> |
| Personal and professional privacy                            | <input type="radio"/> | <input type="radio"/>    | <input type="radio"/>              | <input type="radio"/>   | <input type="radio"/> |
| Clinicians' access to up-to-date knowledge                   | <input type="radio"/> | <input type="radio"/>    | <input type="radio"/>              | <input type="radio"/>   | <input type="radio"/> |
| Patients' satisfaction with the quality of care they receive | <input type="radio"/> | <input type="radio"/>    | <input type="radio"/>              | <input type="radio"/>   | <input type="radio"/> |
| Generalists' ability to manage more complex problems         | <input type="radio"/> | <input type="radio"/>    | <input type="radio"/>              | <input type="radio"/>   | <input type="radio"/> |

If you have any other comments about this EHR and its use in the practice, please provide below:

**Thanks for your cooperation!**
